# Supplementary material for: Learning molecular fingerprints of foods to decode dietary intake
Source: Research Square preprint supplement (doi:10.21203/rs.3.rs-7652253/v1), 2025-10-15
Supplement: Supplementary file 3 [file e3771d948e57bb693cbd1e1e.docx]

**Methods:**

**LC-MS Sample preparation:**

Diet samples were collected as a part of GlobalFoodomics Project, and additional foods were added by purchasing at a local grocery store. Information regarding the diet samples with pictures are deposited in MassIVE and can be found in (MSV00096584) dataset. Initially, ~20-100 mgs of samples were transferred to an Eppendorf tube with a steel bead. Following the transfer, 800 µL 50:50 methanol/water was added, and samples were homogenized at 25 Hz for 5 mins using a tissue lyser. Following incubation for 30 mins at 4°C, samples were then centrifuged at 13,000 rpm for 10 mins and 420 uL of supernatant was transferred into a fresh Eppendorf tube. The samples were dried on a CentriVap (Labconco) and stored at -80 °C until LC-MS analyses. The samples were resuspended in 400 µL 50:50 methanol/water containing 1 µM sulfadimethoxine as internal standard prior to LC-MS analyses.

**Untargeted MS-MS analysis**

The LC-MS/MS analyses were performed with a Vanquish UHPLC system coupled to a Q-Exactive Orbitrap mass spectrometer (Thermo Fisher Scientific). The chromatographic separation was performed with a C18 porous core column (Kinetex C18, 100 x 2.1 mm, 2.6 µm particle size, 100 A pore size – Phenomenex, Torrance, USA), and the mobile phase consists of solvent A as H2O, and solvent B as acetonitrile (ACN) – both containing 0.1 % formic acid (FA).

The gradient employed was: 0-1 min isocratic at 5% B and 1-7 min from 5% B to 40% B as linear gradient, followed by 98% B 7-10 min, and another 2 min for re-equilibration at 5% B. The flow rate was set as 0.5 mL/min, injection volume as 3 µL, and column temperature of 40 ˚C. The tandem mass spectra were acquired using Data-Dependent Acquisition (DDA) mode in positive ionization mode. The parameters for the electrospray ionization (ESI) were set as follows: 53 AU sheath gas flow, 14 AU auxiliary gas flow, 3 AU sweep gas flow, and 438 °C auxiliary gas temperature; the spray voltage was set to 3.5 kV and the inlet capillary to 269 °C and 50 V S-lens level was applied. MS scan range 100-1500 m/z with a resolution of 35,000, and MS/MS scan range starting at 50 m/z with a resolution of 17,500 was applied. The maximum ion injection time for MS/MS scans was set to 100 ms, with an AGC target of 5E5 ions. The MS/MS precursor isolation window was set to 1.5 m/z. The normalized collision energy was set to a stepwise increase from 20 to 30 to 40%. MS/MS scans were triggered at the apex of the chromatographic peaks within 2 to 8 s from their first occurrence. Dynamic precursor exclusion was turned off. An inclusion list of 210 diet molecules was included for MS/MS acquisition.

**MS/MS data processing and Feature-Based Molecular Networking:**

The acquired raw LC-MS/MS data were converted to .mzML format using MSConvert (ProteoWizard, Palo Alto, CA, USA), and the data was processed using MZmine4 version 4.3.0. The mzML files were imported using the advanced import module with both MS1 and MS2 detection set to Factor of lowest signal, with a noise level set to 4 for MS1, and to 2.5 for MS2. The chromatogram construction was performed, where the minimum consecutive scans was set to 4, the minimum intensity for consecutive scans was set to 1.0E4, minimum absolute height set to 5.0E4, and tolerance set to 0.01 m/z or 10 ppm. A smoothing of the chromatograms was applied using Savitsky Golay algorithm, with retention time (RT) smoothing set to 5. The local minimum feature resolver module was used for chromatogram deconvolution, with a chromatographic threshold of 90%, a minimum search range in RT of 0.05 min, a minimum relative height of 1%, minimum absolute height of 5.0E4, minimum ratio of peak top/edge of 2.0, a peak duration of 0.01-1.51 min, and a minimum of 4 data points. The 13C isotope filter module was used by setting a m/z tolerance of 0.01 m/z or 5 ppm, RT tolerance of 0.05 min, and setting the maximum charge to 2 and the representative isotope as the most intense one. Then, the features were aligned using tolerance of 0.002 m/z or 5 ppm, and RT tolerance of 0.05 min, giving a weight for m/z and RT as 3 and 1, respectively. Gap filling was then performed using an intensity tolerance of 20%, mass tolerance of 0.0015 m/z or 5 ppm, RT tolerance of 0.1 min, and a minimum of 1 data point. A features list filter was applied to validate the 13C isotope pattern with a m/z tolerance of 0.0015 m/z to 5 ppm, with maximum charge of 2. Then, a duplicate peak filter was applied using a new average filter mode with an m/z tolerance of 0.0008 m/z or 1.5 ppm and an RT tolerance of 0.1 min. A peak area feature quantification table was exported as a .csv file, in addition to a consensus MS/MS spectral data in .mgf format.

The exported files were subjected to the Feature-Based Molecular Networking workflow in the Global Natural Products Social Molecular Networking (GNPS2) platform. The precursor ion tolerance was set to 0.02 Da and fragment ion tolerance was set to 0.05 Da. The molecular network was created by selecting a minimum cosine score of 0.6 and at least four matched peaks. Compounds with the same fragmentation spectrum but with different retention times were represented as separate nodes, indicating isomers.

**Biomarker identification from food metabolomics samples:** From the MS/MS spectral data (.mgf) and quantification table was used to identify MS/MS spectral features as biomarkers for foods. Using R-as a data analysis tool, Orthogonal Partial Least-Square Discriminant Analysis (OPLS-DA) was performed on the MS/MS spectral features to separate food classes based on food ontology reported earlier. Following the PLS-DA analysis, variable-importance projection (vip) scores were calculated using mixOmics package in R. Following identification of vip scores, the mean relative mean intensity of a designated food class was compared against the mean intensities of foods that didn’t belong to the food class. MS/MS features with 4-fold higher intensity in a food group along with a vip score of more than 4 in an OPLS-DA model were assigned as a biomarker to a specific food class. List of annotated and unannotated biomarkers can be found in our GitHub repository: <https://github.com/harsha-gouda/Dietary_readout>

**Dietary scores:** Dietary scores in unknown samples were obtained using spectral matching to MS/MS food biomarkers and then by summing total ion count normalized feature intensities of detected biomarkers using the equation,

Dietary score for food(x) =

( = intensity of feature n, N= total number of features detected for food class)

**Analysis of Food spiking experiments:** Food extracts of trail mix, kale pasta, walnuts and cheese were used to perform spiking experiments (MSV000097994). Cheese and walnut extracts were mixed in 5:95, 10:90, 20:80, 30:70 and 50:50 ratio with pasta and trail mix extracts respectively. Untargeted metabolomics data (UHPLC-MS/MS) was acquired similar to 500 foods, as mentioned in the previous section. Following data processing, dietary scores were calculated using integrated peak intensities of MS/MS food biomarkers, obtained using the library matching with the food reference library.

**Code availability:**

The code used for biomarker identification, and all downstream metabolomics analysis to generate the Figures can be found in the GitHub repository: <https://github.com/harsha-gouda/Dietary_readout>

**“Food readout” web-based application:** For access to wider metabolomics and nutritional researchers, we developed a web-based application to obtain dietary readout with a single click of button. Tow GNPS2 taskID, The comprehensive workflow for use of the application is is located in the GNPS2 documentation: (<https://wang-bioinformatics-lab.github.io/GNPS2_Documentation/metaboapp_Food_Readout/>)

**Reanalysis of Public metabolomics datasets from GNPS/MassIVE:**

**1. Analysis of NIST reference fecal samples:** For NIST reference stool samples, a 20 mg stool sample was measured and placed in a 1.5 mL screw-cap homogenization tube, and sample was extracted using the same protocol as mentioned above for food samples. Data acquisition, feature extraction and gnps molecular networking was performed using the same settings as described earlier. Data converted into .mzML using MSConvert and uploaded to GNPS/MassIVE. Following GNPS2 task links can be used in food readout web app to obtain dietary readout on NIST reference stool samples.

Massive data accession: MSV000098937

Library matching: <https://gnps2.org/status?task=2a20536c11874dcaa4e5753143e07140>

Molecular networking: <https://gnps2.org/status?task=640fe3da659b44b6a7bac0bee1985cb6>

**2. Analysis of Mice diet study**

Sample collection and extraction**:** Fresh fecal pellets from mice under dietary intervention were collected into Eppendorf tubes on ice and subsequently stored at −80 °C until extraction.All solvent used during extraction are LC/MS grade (Thermo Fisher). Samples were weighted and thawed at room temperature for 20 to 30 min and extracted using 80% MeOH/H2O at a ratio of 20 mg for 500 µL of solvent. A 5 mm stainless steel bead was added to the sample before being homogenized in a Qiagen TissueLyser II for 5 min at 25 Hz. Then, samples were incubated at 4 ℃ overnight before centrifugation at 15,000 x g for 10 min. Two hundred microliters of the supernatant were transferred in a new 2 mL Eppendorf tube and dried in a CentriVap overnight. Dried samples were stored at -80 ℃ until LC-MS/MS analysis.

LC-MS/MS data acquisition: Samples were reconstituted in 200 µL of 80% MeOH/H2O with an internal standard (sulfadimethoxine) and incubated at -20 ℃ overnight before being centrifuged at 15,000 x g for 10 min. Supernant (150 µL) was transferred to a glass vial containing a glass insert and randomized before being ran on a Vanquish UHPLC (ultra-high performance liquid chromatography) coupled to an Orbitrap Exploris 240 mass spectrometer (Thermo Fisher Scientific). Chromatographic separation was performed using a Phenomenex polar C18 (2.6 µm particle size, 100 mm x 2.1 mm) and the mobile phase solvent A (H2O + 0.1% FA) and solvent B (ACN + 0.1% FA). Five microliters were injected and eluted at a flow rate of 0.5 mL/min using the following gradient 0.5-1 min 5%B; 1-7.5 min 40% B; 7.5-8.5 min 99%B; 8.5-9.5 min 99%B; 9.5-10 min 5%B; 10-10.5 min 5%B; 10.5-10.75 min 99%B; 10.75-11.25 min 99% B; 11.25-11.5 min 99% B; 11.5-12 min 5%B. Tandem mass spectrometry (MS/MS) was acquired in data-dependent acquisition (DDA) mode and only in positive ionization. ESI+ parameters were set to 3.5 kV, sheath gas (Arb) set to 50, Aux Gas (Arb) set to 10, and Sweep gas (Arb) to 1. Ion transfer tube temperature was 325 ℃ and vaporizer temperature was 350 ℃. The mass scan range was set to 150 - 2000 *m/z* with a resolution at 60,000 at *m/z* 200 with one microscan. RF Lens (%) was set to 70, automatic gain control (AGC) to standard, maximum injection time to auto, and data was acquired in profile. To trigger a DDA scan, an intensity of 1E4 was required. Dynamic exclusion was set to custom and the following parameters were set: Exclude after 2 times, if it occurs within 3 s for a duration of 4 s. Up to 10 MS/MS (TopN = 10) spectra per MS1 were collected with a resolution of 22,500 at *m/z* 200 with one microscan. Scan range mode and injection time were set to Auto and the isolation window was set to 1 *m/z* and an isolation offset at Off. Collision energy type was set to normalized with a stepwise increase of 25, 40, and 60 with an AGC target of 200%. This dataset was acquired using the deep-scan mode. Two blanks were injected to generate the exclusion list (the second blank was used as reference), and four pooled quality control (QCpool) injections were used to build the final exclusion list.

Data processing: The .raw files generated using the Orbitrap Exploris 240 were converted into .mzML open access format using ProteoWizard MSConvert and uploaded to GNPS/MassIVE under the following accession number MSV000097333. The mzML files were imported using the advanced import module with both MS1 and MS2 detection set to Factor of lowest signal, with a noise level set to 3 for MS1, and to 2 for MS2. The chromatogram construction was performed, where the minimum consecutive scans was set to 4, the minimum intensity for consecutive scans was set to 1.0E4, minimum absolute height set to 1.0E4, and tolerance set to 0.002 m/z or 10 ppm. A smoothing of the chromatograms was applied using Savitsky Golay algorithm, with retention time (RT) smoothing set to 5. The local minimum feature resolver module was used for chromatogram deconvolution, with a chromatographic threshold of 90%, a minimum search range in RT of 0.05 min, minimum absolute height of 5.0E4, minimum ratio of peak top/edge of 1.5, a peak duration of 0.01-1.51 min, and a minimum of 3 data points. The 13C isotope filter module was used by setting a m/z tolerance of 0.0015 m/z or 3 ppm, RT tolerance of 0.04 min, and setting the maximum charge to 2 and the representative isotope as the most intense one. Then, the features were aligned using tolerance of 0.002 m/z or 10 ppm, and RT tolerance of 0.05 min, giving a weight for m/z and RT as 3 and 1, respectively. Gap filling was then performed using an intensity tolerance of 20%, mass tolerance of 0.002 m/z or 10 ppm, RT tolerance of 0.05 min, and a minimum of 1 data point. A features list filter was applied to validate the 13C isotope pattern with a m/z tolerance of 0.0015 m/z to 5 ppm, with maximum charge of 2. Then, a duplicate peak filter was applied using a new average filter mode with an m/z tolerance of 0.0008 m/z or 1.5 ppm and an RT tolerance of 0.04 min. A peak area feature quantification table was exported as a .csv file, in addition to a consensus MS/MS spectral data in .mgf format. Following GNPS2 task links can be used in food readout web app to obtain dietary readout.

Massive data accession: MSV00097333

Library matching:<https://gnps2.org/status?task=b00468d72ac642f8b1109aa627f1649c>

Molecular networking: <https://gnps2.org/status?task=057283987ac946b9b220e0094faef7fb>

**3. Mediterranean diet crossover study:**

The Institutional Review Board at the Pennsylvania State University and MedStar Health Research Institute (for Beltsville Human Nutrition Research Center) approved the study protocol before the initiation of the study and all participants provided written informed consent. The trial is registered at [clinicaltrials.gov](http://clinicaltrials.gov/) (identifier: NCT02723617). The stool samples were prepared following the protocol established by Tian et al. The methods for this study and preliminary results have been previously published. A 25 mg stool sample was measured and placed in a 1.5 mL screw-cap homogenization tube, to which approximately 50 μL of 0.1 mm zirconia beads were added. Subsequently, 1 mL of ice-cold methanol containing 0.5 μM deuterated internal bile acid standards was added to the sample. The samples were thoroughly homogenized using a Precellys 24 tissue homogenizer, operating at 6500 rpm for two 20-second intervals. Following homogenization, the samples underwent a freeze-thaw cycle three times in liquid nitrogen and were centrifuged at 15,000 rpm at a temperature of 4 °C. Finally, a 200 μL of the supernatant was transferred to autosampler vials in preparation for LC-MS/MS analysis.

LC-MS/MS analyses were performed using a Thermo Scientific™ Orbitrap Exploris™ 120 Mass Spectrometer system coupled with a Thermo Scientific™ Vanquish™ UHPLC System (Thermo Scientific, Waltham, MA). The chromatographic separation was carried out using an ACQUITY BEH C18 UPLC column (2.1 x 100 mm, 1.7 μm; Waters, Milford, MA). The column was maintained at a temperature of 60 °C. The mobile phase solvent A was a mixture of 9 % acetonitrile and 1 mM ammonium acetate with a pH of 4.15, and the solvent B was a 1:1 ratio of acetonitrile and isopropanol. Samples (3 μL) were injected into the column and an initial mobile phase was 10 % B and kept for 0.1 min. Mobile phase B was increased in consecutive linear gradients from 10 % to 35 % over 9.15 min, 35 % to 85 % B over 2.25 min, and 85 % to 100 % B over 0.3 min. 100 % B was then held for 0.6 min followed by a linear gradient to 10 % B over 0.1 min and held for 2.5 min, for a total of 15 min. The flow rate was modified throughout the run starting with 300 μL/min for 9.25 min, then increasing to 325 μL/min over 2.25 min and 500 μL/min over 0.6 min. The flow rate was held at 500 μL/min for 0.3 min, then reduced to 300 μL/min over 0.4 min and held for 2.2 min. MS analyses for MS1 full scan were carried out using heated electrospray ionization in polarity switching mode using the following settings: positive and negative spray voltages of 3.5 kV and 2.5 kV respectively, sheath gas 50 Arb, auxiliary gas 10 Arb, sweep gas 1 Arb, ion transfer tube temperature 325 °C, vaporize temperature 350 °C and Orbitrap resolution of 120,000. The scan range (m/z) was from 100 to 1000.

Dietary scores were obtained using the MS/MS spectral library matching with the food MS/MS library created from the 500 foods. Boxplots representing the dietary scores for different diet periods were generated using the `ggplot2` package in R. Following GNPS2 task links can be used in food readout web app to obtain dietary readout.

Massive data accession: MSV00093005

Library matching:<https://gnps2.org/status?task=068cd009892147f1b5e2e5f193619c9f>

Molecular networking: <https://gnps2.org/status?task=44c230c190d2498db1ede8d5cb1681c4>

**4. Crohn’s food re-introduction (iPENS) study:**Sample and Data acquisition:

Ethical approval was obtained by the West of Scotland Research Ethics Committee 5 (19/WS/0163). A multicentre, prospective study was performed to identify dietary triggers of Crohn’s disease. Children and young adults with active Crohn’s disease (6-17 years) who were clinically responding to a 6-8 week course of exclusive enteral nutrition (EEN) were recruited from 11 paediatric hospitals across the UK. Treatment with EEN includes the consumption of a liquid-only diet, without allowing consumption of any solid food, and is one of the primary therapies for mild-moderate active, paediatric Crohn’s disease in the UK. Patients were subsequently followed for 21 days during reintroduction of solid food, immediately after EEN completion, to explore associations between diet intake and recurrence of gut inflammation. Diet intake was recorded, daily, using estimated weight food records. Food records were entered into a nutritional analysis software (Nutritics, Dublin, Ireland) and macronutrient and food group intake was calculated. Urine samples were collected at set timepoints; days 3, 6, 9, 12, 15 and 21 following EEN completion. Samples were collected at patients’ homes, were immediately frozen in domestic freezers (-20oC) and transported frozen to the laboratory. After thawing, they were vortexed, aliquoted in eppendorf tubes and stored in -80oC for downstream analysis. Following a second thaw cycle, they were aliquoted into a 96-well plate and prepared using an optimised dilute-and-shoot protocol. Metabolite extraction was performed using H₂O as the extraction solvent with a 1:5 urine: H₂O dilution. The samples were mixed with a pipette to ensure solvent distribution, and the plate was submitted for UHPLC-MS analysis. 13C labelled tryptophan was used as an internal standard for assessing instrument stability and experimental conditions.

Untargeted metabolomic data was acquired using an ultra-high performance liquid chromatography (UHPLC) system (ThermoFisher Scientific) coupled to an Orbitrap Exploris 240 (ThermoFisher Scientific) mass spectrometer. Chromatographic separation was performed on a Vanquish Accucore C18 + UHPLC analytical column (ThermoScientific, 100 mm × 2.1 mm, 2.6 μM). Mobile phase A was composed of 99.9% water + 0.1% formic acid and mobile B was composed of 99.9% ACN + 0.1% formic acid. Electrospray ionisation (ESI) was used as the ionisation method in positive mode (3900 V). The source-dependent parameters were operated under the following conditions: sheath gas, 40 Arb; auxiliary gas, 10 Arb; sweep gas, 1 Arb; ion transfer tube temperature, 300 °C; vaporiser temperature, 280 °C. Instrument calibration was performed using PierceTM FlexMixTM calibration solution (Thermo Scientific) and ran under vendor recommended settings. MS data collection was performed in data dependent acquisition mode (DDA).

MS/MS data was processed using MZmine4 version 4.3.0. The mzML files were imported using the advanced import module with both MS1 and MS2 detection set to Factor of lowest signal, with a noise level set to 4 for MS1, and to 2.5 for MS2. The chromatogram construction was performed, where the minimum consecutive scans was set to 4, the minimum intensity for consecutive scans was set to 1.0E5, minimum absolute height set to 1.0E6, and tolerance set to 0.01 m/z or 10 ppm. A smoothing of the chromatograms was applied using Savitsky Golay algorithm, with retention time (RT) smoothing set to 5. The local minimum feature resolver module was used for chromatogram deconvolution, with a chromatographic threshold of 90%, a minimum search range in RT of 0.05 min, a minimum relative height of 1%, minimum absolute height of 5.0E4, minimum ratio of peak top/edge of 2.0, a peak duration of 0.01-1.51 min, and a minimum of 4 data points. The 13C isotope filter module was used by setting a m/z tolerance of 0.01 m/z or 5 ppm, RT tolerance of 0.05 min, and setting the maximum charge to 2 and the representative isotope as the most intense one. Then, the features were aligned using tolerance of 0.002 m/z or 5 ppm, and RT tolerance of 0.05 min, giving a weight for m/z and RT as 3 and 1, respectively. Gap filling was then performed using an intensity tolerance of 20%, mass tolerance of 0.0015 m/z or 5 ppm, RT tolerance of 0.1 min, and a minimum of 1 data point. A features list filter was applied to validate the 13C isotope pattern with a m/z tolerance of 0.0015 m/z to 5 ppm, with maximum charge of 2. Then, a duplicate peak filter was applied using a new average filter mode with an m/z tolerance of 0.0008 m/z or 1.5 ppm and an RT tolerance of 0.1 min. A peak area feature quantification table was exported as a .csv file, in addition to a consensus MS/MS spectral data in .mgf format.

Dietary scores were obtained using the MS/MS spectral library matching with the food MS/MS library created from the 500 foods. Correlation plots were generated using the `pheatmap` and ggplot package in R. Following GNPS2 task links can be used in food readout web app to obtain dietary readout.

MassiVE data accession:MSV000096125

Library matching; <https://gnps2.org/status?task=fd5f98061f254d6296384893f378c799>

Molecular networking; <https://gnps2.org/status?task=8d8608159d124e3c86f12f8988c30c02>

**5. Rheumatoid Arthritis observational study:**

Data acquisition: Ethical approval for the study was granted by the Institutional Review Board (IRB) at University of California at San Diego. A prospective, open label pilot trial was conducted to evaluate clinical and biological outcomes of a 2-week isocaloric ITIS diet. Research visits were performed on 3 occasions during the study. During their first visit (D-14), we established their clinical and biological baseline, and patients were asked to complete a daily diet log for 2 weeks before starting the diet. On their second visit (D0), two weeks later, patients were given instructions on how to follow the energy-adjusted ITIS diet and were also asked to complete a daily diet log for 2 weeks after starting the diet. On their third visit (D14), we evaluated diet adherence, trial satisfaction, and clinical parameters. At each visit, a thorough clinical examination was performed, which included the number of tender (TJC) and swollen joints. Pain and fatigue were evaluated by the patient, using a Visual Analogue Scale (VAS) that ranged from 0 to 10. HAQ (Health Assessment Questionnaire) was collected, and general health status evaluated by the patient (VAS_pt) and by the physician (VAS_MD) were also collected. Composite scores including Simplified Disease Activity Index (SDAI), Clinical Disease Activity Index (CDAI) and Disease Activity Index 28 (DAS28CRP) were calculated.

Patients were asked to collect stool samples at home after each visit in special sealed plastic containers provided on the day of the visit. Stool samples were shipped in cooled containers, aliquoted and kept at -80 °C until analysis. The stools from the BD Falcon SWUBE Collection and Transport System were added into Nunc 96‐Well Polypropylene DeepWell Storage Plates. Sample barcodes were scanned using a barcode scanner and saved into a Google Sheets spreadsheet generating a record of which sample was positioned in each well of the plate. Three hundred µL of MeOH‐water (1:1) was added to each well using a multichannel pipette. The deep well plate was covered with a storage mat and floated in an ultrasonic bath for 5 minutes. The samples were placed in a 4°C refrigerator overnight to extract. Subsequently, the swabs were removed from each well using tweezers, rinsing in between with nanopure water. The swab tips were disposed of in the solid biohazardous waste. Extracts were evaporated until dry using a CentriVap Benchtop Vacuum Concentrator (Labconco, Kansas City, MO, USA). The 96‐well plates containing the dried extract were covered (96‐deep well plate mats, Nunc 96 Well Caps for 1.0 mL Polystyrene DeepWell Plates) and stored at −80°C prior to analysis. Immediately prior to analysis, the dried extract material was resuspended in 300 µL of MeOH‐water (1:1), sonicated for 5 minutes, and centrifuged for 5 minutes at 500 g. One hundred µL of extract from each well was transferred into a 96‐well plate (Eppendorf Microplate 96/U‐PP) and diluted twofold using MeOH‐water (1:1) and covered with a plate‐sealing film (Zone‐Free Sealing Films).

Fecal samples were analyzed using LC-MS/MS data acquisition which was performed on a Vanquish ultrahigh-performance liquid chromatography (UPLC) system using a core-shell silica C18 column (2·1 x 50 mm, 1·7-μm particle size, 100-Å pore size; Kinetex, Phenomenex) coupled to a Q Exactive Orbitrap mass spectrometer (Thermo Fisher Scientific, Bremen, Germany). Five microliters of sample were injected and run at 0.5 ml/min on a gradient of solvent A (HPLC-grade water with 0·1% formic acid) and solvent B (HPLC-grade acetonitrile with 0.1% formic acid). The column was maintained at 40 °C. The UPLC elution gradient ran for 12·5 min per sample: 5% B from 0 min to 1 min, a linear gradient of 5 to 100% B over 8 min, a hold at 100% B for 2 min, a return to 5% B over 0·5 min, and a hold at 5% B for 2 min to equilibrate the column for the next sample. The flow was directed into a heated electrospray ionization source operated in positive ionization mode with the following parameters: an auxiliary gas flow rate of 14 arbitrary units (a.u.), sweep gas flow rate of 3 a.u., sheath gas flow rate of 52 a.u., spray voltage of +3·5 kV, capillary temperature of 270°C, auxiliary gas heater temperature of 435°C, and S-Lens RF level of 50. The data-dependent acquisition mode was used to acquire the data in which MS1 scans from *m/z* 100 to 1,500 (scan rate, 7 Hz) were followed by an MS2 scan, specifically a product ion scan produced using stepped normalized collision energy higher-energy collisional dissociation, of the five most abundant ions from the prior MS1 scan.

Data processing and data analysis:Raw data were uploaded to MassIVE (MSV000084556), converted to .mzML files, imported into MZmine2 4, and truncated at *m/z* 1500 and a 9.5-min retention time (RT). The parameters used in MZmine2 are as follows. Mass detection was performed with a noise threshold of 2·0e5 for MS1 and 2·0e3 for MS2 in centroid mode, and chromatograms were built with a 0·05-min time span, 1·0e6 minimum height, and 10-ppm m/z tolerance. Chromatograms were deconvoluted with the baseline cutoff algorithm and a minimum peak height of 1·0e6, peak duration of 0·05 to 1·0 min, and baseline of 1.0e4. Isotope peak removal was performed with 15-ppm *m/z* tolerance, 0.3 min RT tolerance, and maximum charge of 4, and peaks were aligned with 10-ppm *m/z* tolerance, 75 weight *m/z* tolerance, and 0·4 min RT tolerance. Gap filling was also performed with 10% intensity tolerance, 15-ppm *m/z* tolerance, and 0·3 min RT tolerance. Peaks were also filtered to remove singletons found in only one sample. Both MS1 and MS2 feature tables were exported, and the “export for GNPS'' feature was used to generate a .mgf file for GNPS. The signal intensities of the MS1 features were normalized (probabilistic quotient normalization) to the sulfamethoxazine internal standard.

Dietary scores were obtained using the MS/MS spectral matching of the observed fecal features with MS/MS reference library spectra created from the 500 foods. Dietary scores were correlated with clinical observations using a Pearson correlation using R. A plot of dietary score correlation with clinical variables was generated using ggplot in R. Following GNPS2 task links can be used in food readout web app to obtain dietary readout.

MassiVE data accession:MSV000084556

Library matching: <https://gnps2.org/status?task=2369377088274ba1ad3a42ca6d997b7e>

Molecular networking: <https://gnps2.org/status?task=97b563ac8850436abc95f70c69b0f249>
